# Supplementary material for: Disaster Control of Roof Falling in Deep Coal Mine Roadway Subjected to High Abutment Pressure
Source: Hindawi journal article supplement (doi:10.1155/2021/8875249), 2021-01-11
Supplement: f1 [file 8875249.f1.xlsx]

## Sheet: Sheet1
Figure 8			Figure9			Figure 10a				Figure 10b
Lead abutment pressure in the advanced roadway			Roof loads in the advanced roadway			Support strength and roof settlement				Setting load of advanced support
Distances from the workface (m)	Lead abutment pressure (MPa)		Distances form the workface (m)	Roof loads in advanced roadway (MPa)		Distances form the workface (m)	Advanced support strength (MPa)	Movable column length (mm)		Distances form the workface (m)	Advanced supports (MPa)	single props (MPa)
0.30993	11.2824		0.30993	0.10033		0	0.011	168.083		0	2.86026	--
2.28757	12.1624		2.28757	0.10438		0.5	0.01399	172.681		0.5	3.63723	--
4.26521	13.9192		4.26521	0.11044		1	0.01698	177.279		1	4.41364	--
6.24285	17.8368		6.24285	0.1205		1.5	0.01996	181.877		1.5	5.18948	--
8.22049	26.0013		8.22049	0.13618		2	0.02294	186.475		2	5.96477	--
10.1981	33.2541		10.1981	0.1514		2.5	0.02592	191.073		2.5	6.73951	--
12.1758	40.0119		12.1758	0.16406		3	0.0289	195.671		3	7.5137	--
14.1534	43.7334		14.1534	0.16226		3.5	0.03187	200.269		3.5	8.28735	--
16.131	43.0337		16.131	0.15704		4	0.03485	204.868		4	9.06048	--
18.1087	42.0337		18.1087	0.14917		4.5	0.03782	209.466		4.5	9.83308	--
20.0863	41.3192		20.0863	0.13961		5	0.04079	214.064		5	10.6052	--
22.064	39.9824		22.064	0.12884		5.5	0.04376	218.662		5.5	11.3767	--
24.0416	38.4624		24.0416	0.12036		6	0.04672	223.26		6	12.1478	--
26.0192	36.945		26.0192	0.11433		6.5	0.04969	227.858		6.5	12.9183	--
27.9969	35.745		27.9969	0.1096		7	0.05265	232.456		7	13.6884	--
29.9745	34.634		29.9745	0.10719		7.5	0.05561	237.054		7.5	14.4579	--
31.9522	33.745		31.9522	0.10608		8	0.05857	241.652		8	15.227	--
33.9298	32.4824		33.9298	0.10493		8.5	0.06152	246.25		8.5	15.9956	--
35.9074	31.6734		35.9074	0.10446		9	0.06448	250.848		9	16.7637	--
37.8851	30.7536		37.8851	0.10454		9.5	0.06743	255.446		9.5	17.5314	--
39.8627	29.9761		39.8627	0.10471		10	0.07038	260.044		10	18.2985	--
41.8404	29.2761		41.8404	0.10407		10.5	0.07333	264.642		10.5	19.0653	--
43.818	28.5536		43.818	0.10486		11	0.07628	269.24		11	19.8315	--
45.7957	27.8761		45.7957	0.10445		11.5	0.07922	273.838		11.5	20.5973	--
47.7733	27.2761		47.7733	0.10498		12	0.08216	278.436		12	21.3627	--
49.7509	26.6536		49.7509	0.10454		12.2	0.08334	280.275		12.2	21.6687	--
51.7286	26.1761		51.7286	0.10462		13	0.08053	275.881		13	20.9376	--
53.7062	25.8761		53.7062	0.10453		13.5	0.07889	273.327		13.5	20.5123	--
55.6838	25.4536		55.6838	0.10487		14	0.07726	270.773		14	20.0868	--
57.6615	25.0761		57.6615	0.10423		14.5	0.07562	268.218		14.5	19.6613	--
59.6391	24.9761					15	0.07398	265.664		15	19.2356	--
61.6168	24.9736					15.5	0.07235	263.109		15.5	18.8098	--
63.5944	24.9561					16	0.07071	260.555		16	18.3838	--
65.5721	24.9261					16.5	0.06907	258		16.5	17.9576	--
67.5497	24.9036					17	0.06743	255.446		17	17.5314	--
69.3273	24.8911					17.5	0.06579	252.891		17.5	17.105	--
71.505	24.8761					18	0.06415	250.337		18	16.6784	--
73.4826	24.8561					18.5	0.06251	247.782		18.5	16.2517	--
75.4603	24.8361					19	0.06086	245.228		19	15.8248	--
77.4379	24.8161					19.5	0.05922	242.673		19.5	15.3979	--
79.4155	24.7961					20	0.05758	240.119		20	14.9707	--
81.3932	24.7761					20.5	0.05594	237.565		20.5	14.5434	--
83.3708	24.7561					21	0.05429	235.01		21	14.116	--
						21.5	0.05265	232.456		21.5	13.6884	--
						22	0.051	229.901		22	13.2606	--
						22.5	0.04936	227.347		22.5	12.8327	--
						23	0.04771	224.792		23	12.4047	--
						23.5	0.04606	222.238		23.5	11.9765	--
						24	0.04442	219.683		24	11.5481	--
						24.5	0.04277	217.129		24.5	11.1196	--
						25	0.04112	214.574		25	10.6909	--
						25.5	0.03947	212.02		25.5	10.2621	--
						26	0.03782	209.466		26	9.83308	--
						26.5	0.03617	206.911		26.5	9.40392	--
						27	0.03452	204.357		27	8.9746	--
						27.5	0.03287	201.802		27.5	8.54512	--
						28	0.03121	199.248		28	8.11548	--
						28.5	0.02956	196.693		28.5	7.68567	--
						29	0.02791	194.139		29	7.2557	--
						29.5	0.02625	191.584		29.5	6.82555	--
						30	0.0246	189.03		30	6.39525	--
						30.5	0.02294	186.475		30.5	5.96477	--
						31	0.02129	183.921		31	5.53412	--
						31.5	0.01963	181.367		31.5	5.10331	--
						32	0.01797	178.812		32	4.67232	--
						32.5	0.01686	177.109		32.5	--	12.4435
						33	0.01686	177.109		33	--	12.4435
						33.5	0.01686	177.109		33.5	--	12.4435
						34	0.01686	177.109		34	--	12.4435
						34.5	0.01686	177.109		34.5	--	12.4435
						35	0.01686	177.109		35	--	12.4435
						35.5	0.01686	177.109		35.5	--	12.4435
						36	0.01686	177.109		36	--	12.4435
						36.5	0.01686	177.109		36.5	--	12.4435
						37	0.01686	177.109		37	--	12.4435
						37.5	0.01686	177.109		37.5	--	12.4435
						38	0.01686	177.109		38	--	12.4435
						38.5	0.01686	177.109		38.5	--	12.4435
						39	0.01686	177.109		39	--	12.4435
						39.5	0.01686	177.109		39.5	--	12.4435
						40	0.01686	177.109		40	--	12.4435
						40.5	0.01686	177.109		40.5	--	12.4435
						41	0.01686	177.109		41	--	12.4435
						41.5	0.01686	177.109		41.5	--	12.4435
						42	0.01686	177.109		42	--	12.4435
						42.5	0.01686	177.109		42.5	--	12.4435
						43	0.01686	177.109		43	--	12.4435
						43.5	0.01686	177.109		43.5	--	12.4435
						44	0.01686	177.109		44	--	12.4435
						44.5	0.01686	177.109		44.5	--	12.4435
						45	0.01686	177.109		45	--	12.4435
						45.5	0.01686	177.109		45.5	--	12.4435
						46	0.01686	177.109		46	--	12.4435
						46.5	0.01686	177.109		46.5	--	12.4435
						47	0.01686	177.109		47	--	12.4435
						47.5	0.01686	177.109		47.5	--	12.4435
						48	0.01686	177.109		48	--	12.4435
						48.5	0.01686	177.109		48.5	--	12.4435
						49	0.01686	177.109		49	--	12.4435
						49.5	0.01686	177.109		49.5	--	12.4435
						50	0.01686	177.109		50	--	12.4435
						50.5	0.01686	177.109		50.5	--	12.4435
						51	0.01686	177.109		51	--	12.4435
						51.5	0.01686	177.109		51.5	--	12.4435
						52	0.01686	177.109		52	--	12.4435
						52.5	0.01686	177.109		52.5	--	12.4435
						53	0.01686	177.109		53	--	12.4435
						53.5	0.01686	177.109		53.5	--	12.4435
						54	0.01686	177.109		54	--	12.4435
						54.5	0.01686	177.109		54.5	--	12.4435
						55	0.01686	177.109		55	--	12.4435
						55.5	0.01686	177.109		55.5	--	12.4435
						56	0.01686	177.109		56	--	12.4435
						56.5	0.01686	177.109		56.5	--	12.4435
						57	0.01686	177.109		57	--	12.4435
						57.7	0.01686	177.109		57.7	--	12.4435
